# Supplementary material
Source: MDPI journal article supplement (https://www.mdpi.com/2073-4441/14/11/1748)
Supplement: s1 [file s1]

**Table S1** Effects of nitrogen (N) addition on soil pH, SOC, TN.

| Indicators | Subgroups                | n         | lnR    | 95% CIs      | p         | Effect size |
|------------|--------------------------|-----------|--------|--------------|-----------|-------------|
| pH         | All                      | 16        | -0.335 | -0.758—0.088 | p = 0.008 | -0.28       |
|            | Fertilizer types         | N         | 9      | -0.53        |           | -0.41       |
|            |                          | NPK       | 7      | 0.626        |           | 0.87        |
|            |                          | 0-50      | 10     | -0.7         |           | -0.50       |
|            | N addition rate          | 50-200    | 3      | 0.275        |           | 0.32        |
|            |                          | 200+      | 3      | 0.986        |           | 1.68        |
|            | N addition duration      | 0-10      | 10     | -0.377       |           | -0.31       |
|            |                          | 10-20     | 3      | -0.642       |           | -0.47       |
|            |                          | 20+       | 3      | 2.149        |           | 7.58        |
|            | Climate conditions       | Tem       | 8      | -0.242       |           | -0.21       |
|            |                          | Sub       | 8      | 0.444        |           | 0.56        |
|            | Water                    | Dry       | 4      | -0.008       |           | -0.01       |
|            |                          | Wet       | 12     | -0.477       |           | -0.38       |
|            | Nitrogen content         | Limit     | 13     | -0.634       |           | -0.47       |
|            |                          | Unlimited | 3      | 1.161        |           | 2.19        |
|            | Saline-alkali conditions | Fresh     | 13     | -0.309       |           | -0.27       |
|            |                          | Salt      | 3      | -0.421       |           | -0.34       |
| SOC        | All                      | 23        | 0.294  | -0.100—0.688 | p = 0.002 | 0.34        |
|            | Fertilizer types         | N         | 11     | 0.802        |           | 0.22        |
|            |                          | NPK       | 12     | -0.424       |           | 0.59        |
|            |                          | 0-50      | 5      | 0.994        |           | 1.70        |
|            | N addition rate          | 50-200    | 13     | 0.08         |           | 0.08        |
|            |                          | 200+      | 5      | -0.084       |           | -0.08       |
|            | N addition duration      | 0-10      | 10     | 0.576        |           | 0.78        |
|            |                          | 10-20     | 8      | 0.598        |           | 0.82        |
|            |                          | 20+       | 5      | -1.185       |           | -0.69       |
|            | Climate conditions       | Tem       | 11     | 0.92         |           | 1.51        |
|            |                          | Sub       | 12     | -0.398       |           | -0.33       |
|            | Water                    | Dry       | 3      | -0.129       |           | -0.12       |
|            |                          | Wet       | 20     | 0.312        |           | 0.37        |
|            | Nitrogen content         | Limit     | 19     | 0.578        |           | 0.78        |
|            |                          | Unlimited | 4      | -1.106       |           | -0.67       |
|            | Saline-alkali conditions | Fresh     | 19     | 0.379        |           | 0.46        |
|            |                          | Salt      | 4      | -0.017       |           | 0.02        |
| TN         | All                      | 18        | 0.281  | -0.283—0.844 | p = 0.009 | 0.32        |
|            | Fertilizer types         | N         | 8      | 0.196        |           | 0.22        |
|            |                          | NPK       | 10     | 0.466        |           | 0.59        |
|            |                          | 0-50      | 5      | -0.107       |           | -0.10       |
|            | N addition rate          | 50-200    | 9      | 0.445        |           | 0.56        |
|            |                          | 200+      | 4      | 1.11         |           | 2.03        |
|            | N addition duration      | 0-10      | 6      | -0.147       |           | -0.14       |
|            |                          | 10-20     | 10     | 1.035        |           | 1.82        |

|                  |           |    |        |               |       |
|------------------|-----------|----|--------|---------------|-------|
|                  | 20+       | 2  | -0.151 | -1.736—1.434  | -0.14 |
| Climate          | Tem       | 10 | 0.671  | -0.058—1.401  | 0.96  |
| conditions       | Sub       | 8  | -0.298 | -1.185—0.590  | -0.26 |
|                  | Dry       | 4  | 0.168  | -1.115—1.450  | 0.18  |
| Water            | Wet       | 14 | 0.308  | -0.320—0.935  | 0.36  |
|                  | Limit     | 14 | 0.545  | -0.056—1.146  | 0.72  |
| Nitrogen content | Unlimited | 4  | -1.632 | -3.250—-0.015 | -0.80 |
|                  |           |    |        |               |       |
| Saline-alkali    | Fresh     | 16 | 0.684  | 0.050—1.319   | 0.98  |
| conditions       | Salt      | 2  | -1.227 | -2.454—-0.000 | -0.71 |

---

**Table S2** Effects of nitrogen (N) addition on microbial Shannon index, microbial Chao 1 index, microbial Simpson index, microbial ACE index.

| Indicators | Subgroups                | n         | lnR    | 95% CIs      | p            | Effect size |       |
|------------|--------------------------|-----------|--------|--------------|--------------|-------------|-------|
| Shannon    | All                      | 18        | -0.086 | -0.475—0.303 |              | -0.08       |       |
|            | Fertilizer               | N         | 10     | 0.1          | -0.351—0.550 |             | 0.11  |
|            | types                    | NPK       | 8      | -0.629       | -1.400—0.142 |             | -0.47 |
|            |                          | 0-50      | 5      | 0.421        | -0.250—1.091 |             | 0.52  |
|            | N addition rate          | 50-200    | 7      | -0.494       | -1.050—0.062 |             | -0.39 |
|            |                          | 200+      | 6      | 0.083        | -0.851—1.016 |             | 0.09  |
|            |                          | 0-10      | 10     | 0.1          | -0.351—0.550 |             | 0.11  |
|            | N addition duration      | 10-20     | 1      | -1.872       | -3.931—0.188 |             | -0.85 |
|            |                          | 20+       | 7      | -0.426       | -1.258—0.405 |             | -0.35 |
|            | Climate                  | Tem       | 4      | -0.046       | -1.134—1.041 |             | -0.04 |
|            | conditions               | Sub       | 14     | -0.092       | -0.509—0.325 |             | -0.09 |
|            | Nitrogen                 | Limit     | 14     | -0.501       | -0.92—0.077  |             | -0.39 |
|            | content                  | Unlimited | 4      | 2.083        | 1.113—3.054  | p= 0.000    | 7.03  |
|            | Saline-alkali            | Fresh     | 13     | -0.438       | -0.87—0.004  |             | -0.35 |
|            | conditions               | Salt      | 5      | 1.381        | 0.496—2.266  | p= 0.002    | 2.98  |
| Chao 1     | All                      | 13        | -0.757 | -1.25—0.256  |              | -0.53       |       |
|            | Fertilizer               | N         | 6      | -0.712       | -1.27—0.152  | p= 0.013    | -0.51 |
|            | types                    | NPK       | 7      | -0.94        | -2.068—0.187 |             | -0.61 |
|            |                          | 0-50      | 1      | -0.276       | -1.205—0.653 |             | -0.24 |
|            | N addition rate          | 50-200    | 8      | -0.755       | -1.37—0.140  |             | -0.53 |
|            |                          | 200+      | 4      | -3.982       | -6.37—-1.590 | p= 0.001    | -0.98 |
|            |                          | 0-10      | 6      | -0.712       | -1.272-0.152 |             | -0.51 |
|            | N addition duration      | 10-20     | 1      | -0.038       | -1.638—1.563 |             | -0.04 |
|            |                          | 20+       | 6      | -1.829       | -3.418-0.240 |             | -0.84 |
|            | Climate                  | Tem       | 1      | -0.038       | -1.63—1.563  |             | -0.04 |
|            | conditions               | Sub       | 11     | -0.836       | -1.36—0.308  | p= 0.002    | -0.57 |
|            | Saline-alkali conditions | Fresh     | 10     | -0.758       | -1.26—0.257  | p= 0.000    | -0.53 |
| Simpson    | All                      | 9         | -0.672 | -1.14—0.200  |              | -0.49       |       |
|            | Fertilizer               | N         | 5      | -0.968       | -1.51—0.425  | p= 0.000    | -0.62 |
|            | types                    | NPK       | 4      | 0.232        | -0.718—1.181 |             | 0.26  |
|            |                          | 0-50      | 2      | -0.695       | -1.629—0.239 |             | -0.50 |
|            | N addition rate          | 50-200    | 6      | -0.559       | -1.11—0.001  |             | -0.43 |
|            |                          | 200+      | 1      | -3.266       | -6.03—0.494  |             | -0.96 |
|            |                          | 0-10      | 5      | -0.968       | -1.51—0.425  | p= 0.000    | -0.62 |
|            | N addition duration      | 10-20     | 1      | 0.657        | -1.01—2.32   |             | 0.93  |
|            |                          | 20+       | 3      | 0.03         | -1.13—1.18   |             | 0.03  |
|            | Climate                  | Tem       | 6      | 0.039        | -0.772—0.850 |             | 0.04  |
|            | conditions               | Sub       | 3      | -1.035       | -1.61—0.455  | p= 0.000    | -0.64 |
| ACE        | All                      | 4         | -0.28  | -1.89—1.33   |              | -0.24       |       |

**Table S3** Effects of nitrogen (N) addition on the abundance of nitrogen cycling and carbon cycling genes.

| Indicators               | Subgroups                | n         | lnR   | 95% CIs      | p            | Effect size |       |
|--------------------------|--------------------------|-----------|-------|--------------|--------------|-------------|-------|
| nifH                     | All                      | 8         | 1.603 | 0.725—2.481  |              | 3.97        |       |
|                          | N                        | 5         | 2.115 | 0.748—3.481  |              | 7.29        |       |
|                          | Fertilizer               | NPK       | 3     | 1.244        | 0.098—2.389  |             | 2.47  |
|                          | types                    | 50-200    | 4     | 1.705        | 0.361—3.050  |             | 4.50  |
|                          |                          | 200+      | 3     | 1.527        | 0.368—2.686  | p= 0.010    | 3.60  |
|                          | N addition               | 0-10      | 5     | 2.115        | 0.748—3.481  | p= 0.002    | 7.29  |
|                          | duration                 | 20+       | 2     | 1.527        | 0.367—2.686  | p= 0.010    | 3.60  |
|                          | Climate conditions       | Sub       | 7     | 1.773        | 0.889—2.657  | p= 0.000    | 4.89  |
|                          | Nitrogen content         | Limit     | 6     | 1.603        | 0.725—2.481  | p= 0.000    | 3.97  |
|                          | Saline-alkali conditions | Fresh     | 3     | 1.244        | 0.098—2.389  |             | 2.47  |
|                          | Salt                     | 5         | 2.115 | 0.748—3.481  | p= 0.002     | 7.29        |       |
| nirK                     | All                      | 4         | 0.193 | -0.750—1.135 |              | 0.21        |       |
|                          | Fertilizer               | N         | 3     | 0.193        | -0.750—1.135 |             | 0.21  |
|                          | types                    |           |       |              |              |             |       |
|                          | N addition rate          | 0-50      | 2     | 0.989        | -0.342—2.320 |             | 1.69  |
|                          |                          | 200+      | 2     | -0.609       | -1.944—0.726 |             | -0.46 |
|                          | Climate conditions       | Sub       | 3     | 0.193        | -0.750—1.135 |             | 0.21  |
|                          | Nitrogen content         | Limit     | 2     | 0.989        | -0.342—2.320 |             | 1.69  |
|                          |                          | Unlimited | 2     | -0.609       | -1.944—0.726 |             | -0.46 |
| Saline-alkali conditions | Salt                     | 3         | 0.193 | -0.750—1.135 |              | 0.21        |       |
| nirS                     | All                      | 5         | 0.044 | -0.811—0.898 |              | 0.04        |       |
|                          | Fertilizer               | N         | 2     | -0.343       | -1.354—0.669 |             | -0.29 |
|                          | types                    | NPK       | 3     | 1.004        | -0.591—2.600 |             | 1.73  |
|                          | N addition rate          | 0-50      | 2     | -0.343       | -1.354—0.669 |             | -0.29 |
|                          |                          | 200+      | 1     | 0.451        | -1.180—2.081 |             | 0.57  |
|                          | N addition               | 0-10      | 3     | 0.337        | -0.887—1.561 |             | 0.40  |
|                          | duration                 | 10-20     | 2     | -0.235       | -1.429—0.958 |             | -0.21 |
|                          | Climate conditions       | Tem       | 2     | -1.027       | -2.778—0.725 |             | -0.64 |
|                          |                          | Sub       | 3     | 0.378        | -0.601—1.357 |             | 0.46  |
|                          | Water                    | Dry       | 2     | -0.32        | -2.028—1.388 |             | -0.27 |
|                          |                          | Wet       | 3     | 0.165        | -0.822—1.152 |             | 0.18  |
|                          | Nitrogen content         | Limit     | 4     | -0.122       | -0.982—0.738 |             | -0.11 |
|                          | Saline-alkali conditions | Fresh     | 3     | 1.004        | -0.591—2.600 |             | 1.73  |
|                          |                          | Salt      | 2     | -0.343       | -1.354—0.669 |             | -0.29 |
| nosZ                     | All                      | 7         | 0.523 | -0.367—1.414 |              | 0.69        |       |
|                          | Fertilizer               | N         | 4     | 0.78         | -0.286—1.845 |             | 1.18  |

|     |                 |           |   |        |                |          |       |
|-----|-----------------|-----------|---|--------|----------------|----------|-------|
|     | types           | NPK       | 3 | -0.071 | -1.693—1.551   |          | -0.07 |
|     | N addition rate | 0-50      | 4 | 0.781  | -0.285—1.846   |          | 1.18  |
|     |                 | 50-200    | 2 | -0.071 | -1.693—1.551   |          | -0.07 |
|     | N addition      | 0-10      | 5 | -0.786 | -2.323—0.751   |          | -0.54 |
|     | duration        | 10-20     | 1 | 0.817  | -0.881—2.514   |          | 1.26  |
|     |                 | 20+       | 1 | 1.446  | 0.018—2.874    |          | 3.25  |
|     | Climate         | Tem       | 2 | -0.054 | -1.654—1.547   |          | -0.05 |
|     | conditions      | Sub       | 5 | 0.782  | -0.290—1.854   |          | 1.19  |
|     | Water           | Wet       | 5 | 0.79   | -0.112—1.693   |          | 1.20  |
|     | Nitrogen        | Limit     | 4 | 0.791  | -0.111—1.694   |          | 1.21  |
|     | content         |           |   |        |                |          |       |
|     | Saline-alkali   | Fresh     | 3 | -0.071 | -1.693—1.551   |          | -0.07 |
|     | conditions      | Salt      | 4 | 0.78   | -0.286—1.845   |          | 1.18  |
| AOA | All             |           | 3 | 2.468  | 0.893—4.043    |          | 10.80 |
| AOB | All             |           | 7 | -0.531 | -1.530—0.469   |          | -0.41 |
|     | Fertilizer      | N         | 4 | 0.593  | -0.680—1.866   |          | 0.81  |
|     | types           | NPK       | 3 | -2.335 | -3.949—-0.722  |          | -0.90 |
|     |                 | 0-50      | 2 | 0.217  | -1.030—1.464   |          | 0.24  |
|     | N addition rate | 50-200    | 2 | -8.91  | -14.138—-3.682 |          | -1.00 |
|     |                 | 200+      | 3 | -1.074 | -2.839—0.690   |          | -0.66 |
|     | N addition      | 0-10      | 6 | -0.275 | -1.487—0.938   |          | -0.24 |
|     | duration        | 10-20     | 1 | -1.073 | -2.838—0.692   |          | -0.66 |
|     | Climate         | Tem       | 2 | -8.569 | -14.719—-2.419 | p= 0.006 | -1.00 |
|     | conditions      | Sub       | 5 | -0.313 | -1.326—0.700   |          | -0.27 |
|     | Water           | Dry       | 1 | -8.91  | -14.13—-3.682  |          | -1.00 |
|     |                 | Wet       | 6 | -0.213 | -1.231—0.805   |          | -0.19 |
|     | Nitrogen        | Limit     | 4 | -0.212 | -1.231—0.806   |          | -0.19 |
|     | content         | Unlimited | 3 | -8.92  | -14.148—-3.692 |          | -1.00 |
|     | Saline-alkali   | Fresh     | 4 | -2.335 | -3.949 —-0.722 |          | -0.90 |
|     | conditions      | Salt      | 3 | 0.593  | -0.680—1.866   | p= 0.001 | 0.81  |
| PDR | All             |           | 6 | 1.62   | 0.738—2.501    |          | 4.05  |
|     | Fertilizer      | N         | 5 | 1.383  | 0.48—2.28      | p= 0.003 | 2.99  |
|     | types           |           |   |        |                |          |       |
|     | N addition rate | 0-50      | 2 | 1.943  | 0.373—3.513    |          | 5.98  |
|     |                 | 50-200    | 4 | 1.471  | 0.405—2.536    |          | 3.35  |
|     | N addition      | 0-10      | 3 | 2.505  | 1.045—3.965    | p= 0.001 | 11.24 |
|     | duration        | 10-20     | 3 | 1.111  | 0.005—2.217    |          | 2.04  |
|     | Climate         | Tem       | 2 | 1.912  | 0.369—3.454    |          | 5.77  |
|     | conditions      | Sub       | 4 | 1.478  | 0.404—2.553    |          | 3.38  |
|     | Water           | Wet       | 5 | 1.383  | 0.484—2.282    | p= 0.003 | 2.99  |
|     | Nitrogen        | Limit     | 3 | 1.111  | 0.005—2.217    |          | 2.04  |
|     | content         | Unlimited | 3 | 2.505  | 1.045—3.965    | p= 0.001 | 11.24 |
| PNR | All             |           | 4 | -1.03  | -2.084—0.025   | p= 0.019 | -0.64 |
|     | Fertilizer      | N         | 3 | -1.273 | -2.335—-0.211  |          | -0.72 |

|      |                          | types     |       |             |                |          |       |
|------|--------------------------|-----------|-------|-------------|----------------|----------|-------|
|      | N addition rate          | 0-50      | 1     | -1.598      | -3.545—0.348   |          | -0.80 |
|      |                          | 50-200    | 3     | -0.793      | -2.048—0.461   |          | -0.55 |
|      |                          | 10-20     | 3     | -1.273      | -2.335—-0.211  |          | -0.72 |
|      | Climate conditions       | Tem       | 3     | -1.273      | -2.335—-0.211  |          | -0.72 |
|      | Water                    | Wet       | 3     | -1.273      | -2.335—-0.211  |          | -0.72 |
|      | Nitrogen content         | Limit     | 3     | -1.273      | -2.335—-0.211  |          | -0.72 |
| mcrA | All                      |           | 4     | 0.47        | -0.43—1.37     |          | 0.60  |
|      | Fertilizer types         | N         | 3     | 0.28        | -0.633—1.185   |          | 0.32  |
|      | N addition rate          | 0-50      | 2     | 0.74        | -0.33—1.81     |          | 1.10  |
|      |                          | 50-200    | 2     | -0.189      | -1.863—1.484   |          | -0.17 |
|      | Climate conditions       | Tem       | 2     | -0.53       | -1.7—0.65      |          | -0.41 |
|      |                          | Sub       | 2     | 1.9         | 0.49—3.31      |          | 5.69  |
|      | Water                    | Wet       | 3     | 0.276       | -0.633—1.185   |          | 0.32  |
|      | Nitrogen content         | Limit     | 1     | 1.478       | 0.042—2.913    |          | 3.38  |
|      |                          | Unlimited | 3     | -0.192      | -1.350—0.967   |          | -0.17 |
|      | Saline-alkali conditions | Fresh     | 3     | -0.192      | -1.350—0.967   |          | -0.17 |
|      | Salt                     | 1         | 1.478 | 0.042—2.913 |                | 3.38     |       |
| pmoA | All                      |           | 4     | -2.581      | -4.094—-1.067  |          | -0.92 |
|      | Fertilizer types         | N         | 3     | -2.003      | -3.584—-0.422  | p= 0.013 | -0.87 |
|      | N addition rate          | 0-50      | 2     | -2.003      | -3.584—-0.422  | p= 0.013 | -0.87 |
|      | Water                    | Wet       | 3     | -2.003      | -3.584—-0.422  | p= 0.013 | -0.87 |
|      | Nitrogen content         | limit     | 1     | -2.003      | -3.584—-0.422  |          | -0.87 |
|      |                          | Unlimited | 3     | -8.933      | -14.173—-3.693 | p= 0.001 | -1.00 |
|      | Saline-alkali conditions | Salt      | 3     | -2.003      | -3.584—-0.422  |          | -0.87 |

**Table S4** Effects of nitrogen (N) addition on greenhouse gas emissions.(GHG)

| Indicators      | Subgroups                | n         | lnR   | 95% CIs      | p            | Effect size |       |
|-----------------|--------------------------|-----------|-------|--------------|--------------|-------------|-------|
| CH <sub>4</sub> | All                      | 4         | 0.253 | -0.559—1.065 |              | 0.29        |       |
|                 | Fertilizer types         | N         | 3     | 0.189        | -0.624—1.002 |             | 0.21  |
|                 | N addition rate          | 0-50      | 1     | -0.108       | -1.495—1.279 |             | -0.10 |
|                 |                          | 200+      | 2     | 0.344        | -0.659—1.347 |             | 0.41  |
|                 | Water                    | Wet       | 3     | 0.189        | -0.624—1.002 |             | 0.21  |
|                 | Saline-alkali conditions | Salt      | 3     | 0.189        | -0.624—1.002 |             | 0.21  |
| CO <sub>2</sub> | All                      | 3         | 0.617 | -0.469—1.704 |              | 0.85        |       |
|                 | Fertilizer types         | N         | 1     | -0.099       | -1.701—1.503 |             | -0.09 |
|                 |                          | NPK       | 2     | 1.227        | -0.252—2.706 |             | 2.41  |
|                 | N addition duration      | 0-10      | 2     | 0.198        | -0.948—1.343 |             | 0.22  |
|                 |                          | 10-20     | 1     | 4.383        | 0.950—7.816  |             | 79.08 |
|                 | Climate conditions       | Tem       | 2     | 0.198        | -0.948—1.343 |             | 0.22  |
|                 |                          | Sub       | 1     | 4.383        | 0.950—7.816  |             | 79.08 |
|                 | Nitrogen content         | Limit     | 2     | 1.227        | -0.252—2.706 |             | 2.41  |
|                 |                          | Unlimited | 1     | -0.099       | -1.701—1.503 |             | -0.09 |
